# Supplementary material
Source: publisher figshare collection journal article supplement (https://karger.figshare.com/ndownloader/files/25955201)
Supplement: Supplementary file 1 [file 25955201]

Supplementary Figure 1.(A)Amplification of JEV E genetic fragment. M1: DL-2000 Marker; 1,2: PCR products of JEV-E; NC: Negative control. (B) Restriction enzyme digestion of constructed plasmid DNA.M2: DL-5000 Marker; 1: Restricted enzyme digestion DNA products; NC: Negative control.

Supplementary Figure 2. QRT-PCR standard curve of JEV-E gene. The X-axis is the number of starting templates, and the Ct value is the Y-axis. Ct=-3.336log (copy nr) +44.18.
